# Supplementary figures and images for: Comprehensive Analysis of HERV Transcriptome in HIV+ Cells: Absence of HML2 Activation and General Downregulation of Individual HERV Loci
Source: MDPI journal article supplement (doi:10.3390/v12040481), 2020-04-23

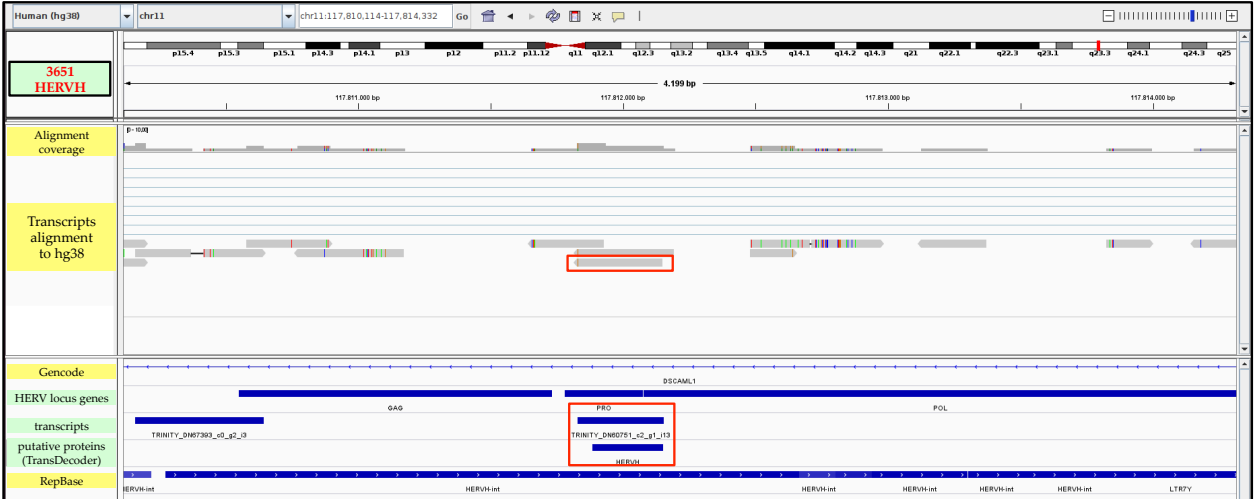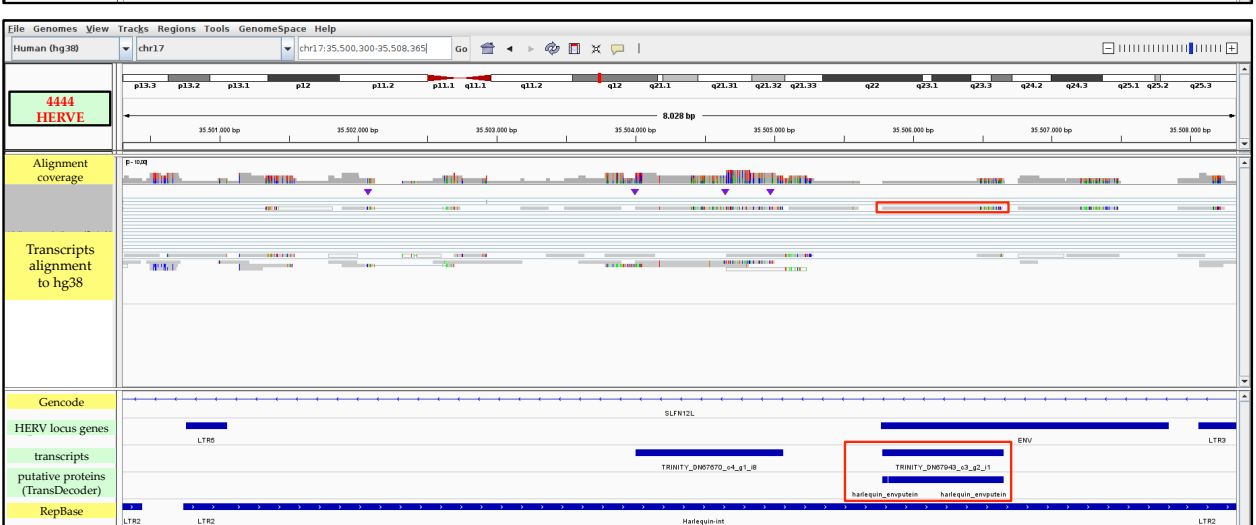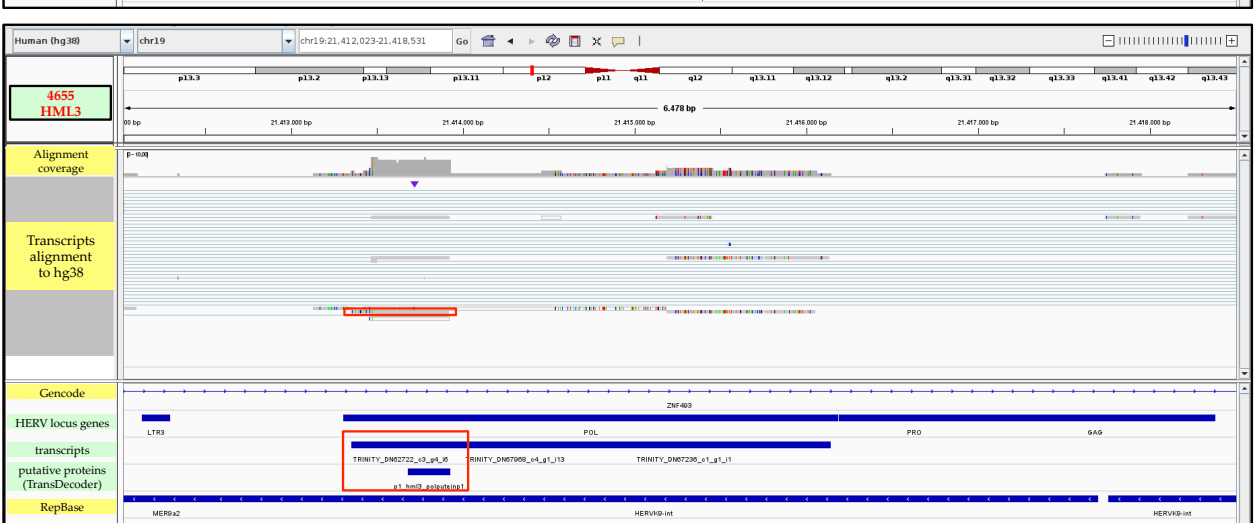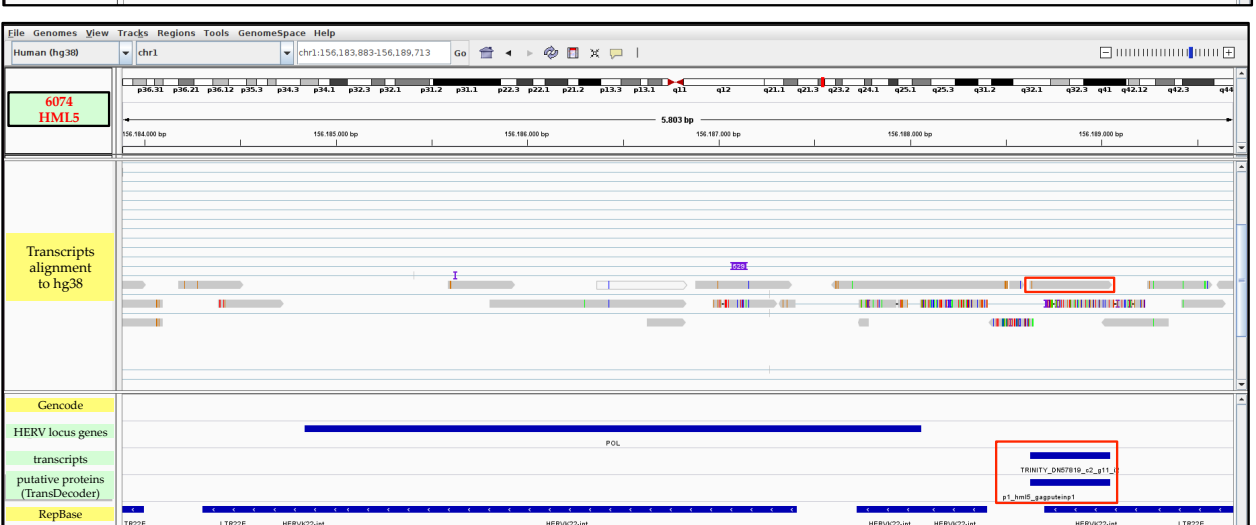

Supplement: s1 [file s1]

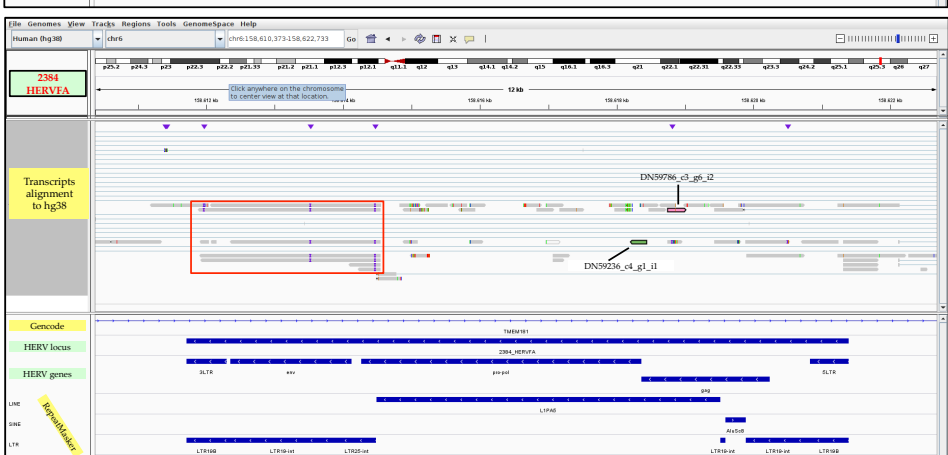

Supplement: s1 [file s1]
